# Supplementary material
Source: publisher figshare collection journal article supplement (https://future-science-group.figshare.com/articles/dataset/_/22346950)
Supplement: Supplementary file 1 [file 1]

**Development and implementation of a novel survey to evaluate the burden and quality of life of caregivers of patients with glioblastoma**

**Additional file 8.** Caregivers’ evaluation of new caregiver survey questionnaire. GBM, glioblastoma.
